# Supplementary material for: Synthesis and Characterization of Zinc/Iron Composite Oxide Heterojunction Porous Anode Materials for High-Performance Lithium-Ion Batteries
Source: MDPI journal article supplement (doi:10.3390/molecules28227665), 2023-11-19
Supplement: s1 [file s1]

## Supporting information

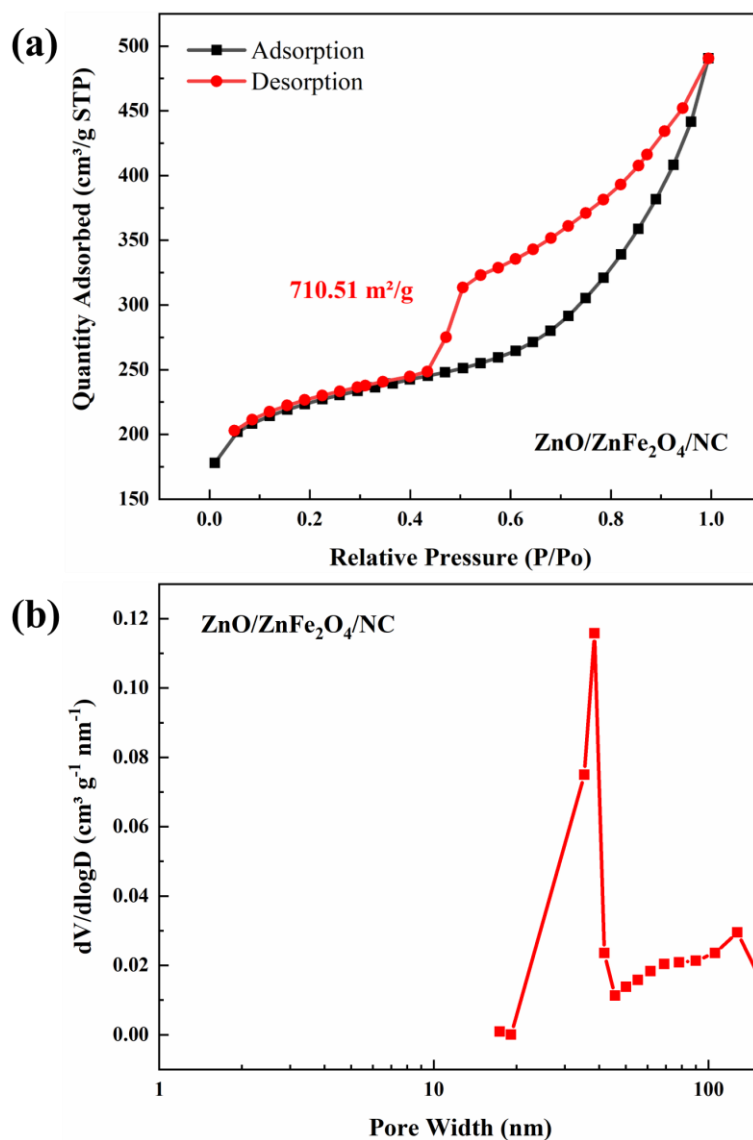

**Figure S1. (a)** Nitrogen adsorption and desorption isotherms; **(b)** distribution of pore size structure of ZnFe/NC

The specific surface area of ZnFe/NC is 710.51 m<sup>2</sup>/g, and the pore size distribution is mainly composed of mesopores at 38.45 nm and macropores at 127.55 nm. The reason why the specific surface area of ZnO/ZnFe<sub>2</sub>O<sub>4</sub>/NC is smaller than that of ZnFe/NC may be due to the gradual occupation of large pores during the crystallization process of metal oxides. However, the reason why the electrochemical performance of ZnO/ZnFe<sub>2</sub>O<sub>4</sub>/NC is superior to that of ZnFe/NC is that it increases the synergistic effect of ZnO and ZnO/ZnFe<sub>2</sub>O<sub>4</sub>/NC bimetallic oxides on the basis of ZnFe/NC carbon nitrogen materials.

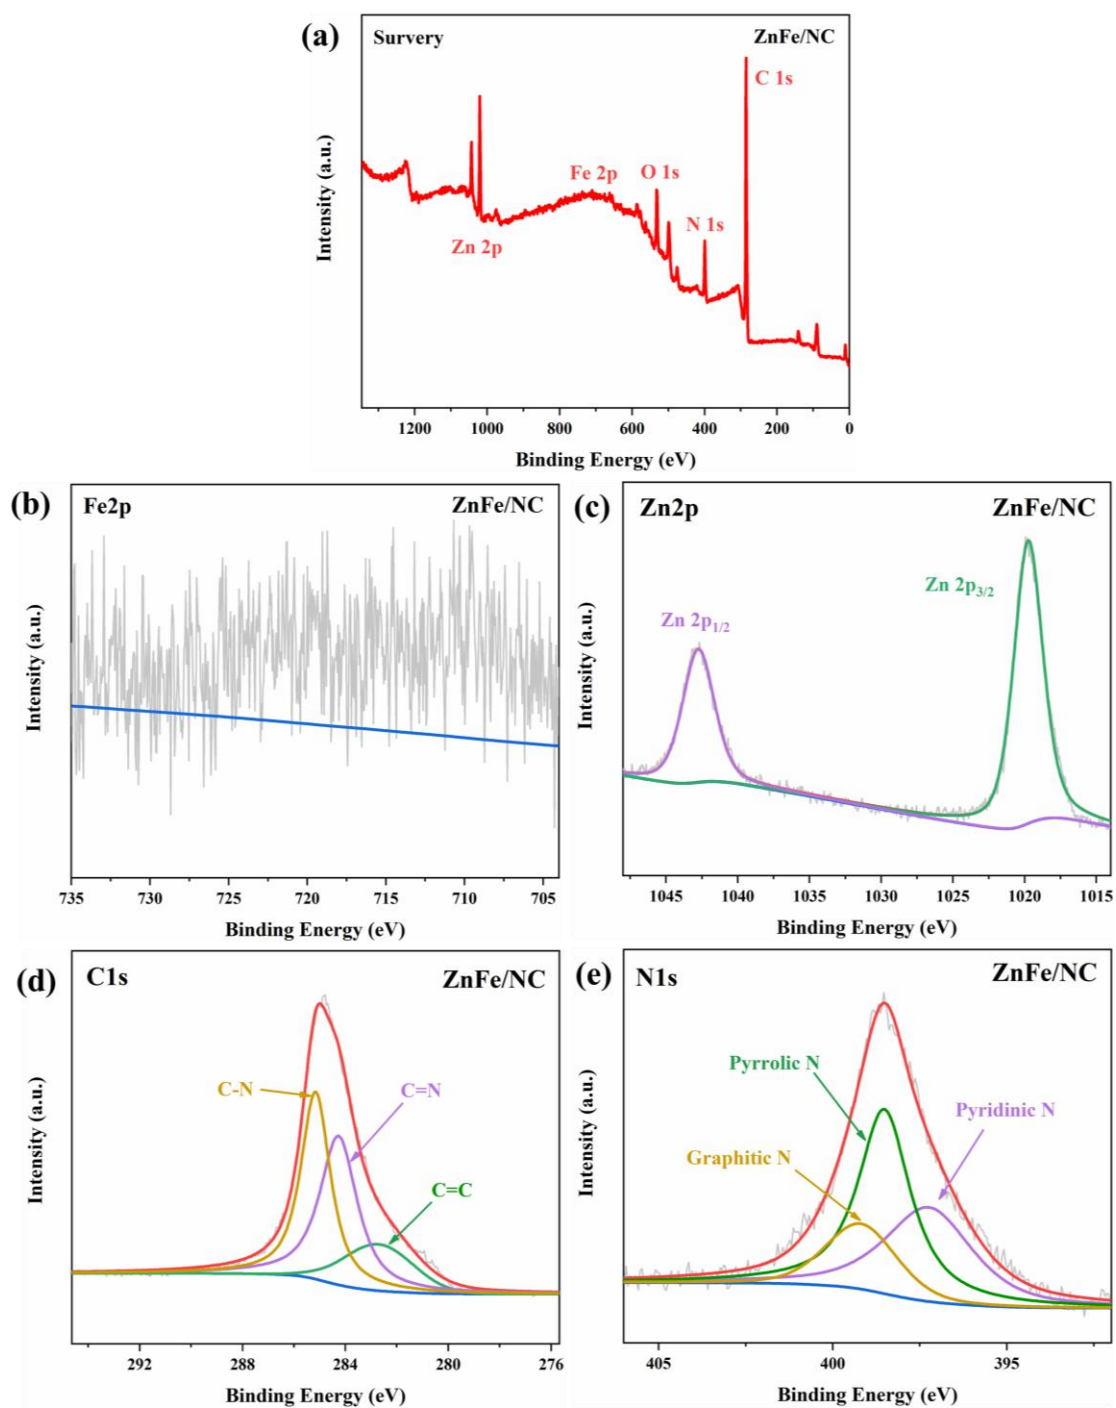

**Figure S2.** XPS spectra of ZnFe/NC: **(a)** total spectrum; high-resolution XPS spectra of **(b)** Fe 2p; **(c)** Zn 2p; **(d)** C 1s; **(e)** N 1s.

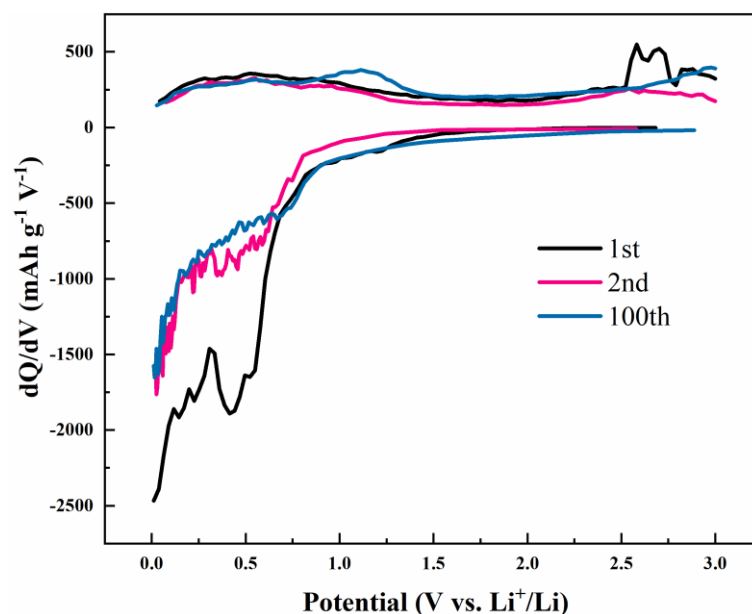

**Figure S3.** dQ/dV curve of ZnO/ZnFe<sub>2</sub>O<sub>4</sub>/NC

The differential capacity diagram (dQ/dV) is shown in Figure S3. For ZnO/ZnFe<sub>2</sub>O<sub>4</sub>/NC samples, it is evident that the trend is similar to the CV cycle. Except for the first cycle, the subsequent cycles basically overlap, indicating that a Li<sup>+</sup> storage reaction occurred in the first cycle. During the first cycle of ZnO/ZnFe<sub>2</sub>O<sub>4</sub>/NC (Figure 4a in the main text), the cathodic peaks at approximately 0.64 and 0.35V can be attributed to the decomposition of ZnO and ZnFe<sub>2</sub>O<sub>4</sub> to form Zn<sup>0</sup> and Fe<sup>0</sup>.
